# Supplementary material
Source: PubMed Central journal article supplement (PMC7413886)
Supplement: mmc1.pdf [file mmc1.pdf]

## Supplemental Data

### **Bi-allelic *HPDL* Variants Cause a Neurodegenerative Disease Ranging from Neonatal Encephalopathy to Adolescent-Onset Spastic Paraplegia**

**Ralf A. Husain, Mona Grimmel, Matias Wagner, J. Christopher Hennings, Christian Marx, René G. Feichtinger, Abdelkrim Saadi, Kevin Rostásy, Florentine Radelfahr, Andrea Bevot, Marion Döbler-Neumann, Hans Hartmann, Laurence Colleaux, Isabell Cordts, Xenia Kobeleva, Hossein Darvish, Somayeh Bakhtiari, Michael C. Kruer, Arnaud Besse, Andy Cheuk-Him Ng, Diana Chiang, Francois Bolduc, Abbas Tafakhori, Shrikant Mane, Saghar Ghasemi Firouzabadi, Antje K. Huebner, Rebecca Buchert, Stefanie Beck-Woedl, Amelie J. Müller, Lucia Laugwitz, Thomas Nägele, Zhao-Qi Wang, Tim M. Strom, Marc Sturm, Thomas Meitinger, Thomas Klockgether, Olaf Riess, Thomas Klopstock, Ulrich Brandl, Christian A. Hübner, Marcus Deschauer, Johannes A. Mayr, Penelope E. Bonnen, Ingeborg Krägeloh-Mann, Saskia B. Wortmann, and Tobias B. Haack**

## Supplemental Data

### SUPPLEMENTAL NOTE: CASE REPORTS

#### Family 1 (Congenital phenotype)

**Individual F1:II.1** is an 8-year-old male, born to unrelated healthy parents from Algeria. His younger sister (F1:II.2) is similarly affected, a younger brother is healthy. IUGR was observed and he was born at term with a marked microcephaly (weight -3.2 SD, length -2.8 SD, head circumference -5.1 SD) and muscular hypotonia, and difficulty of sucking were noted. The further disease course was characterized by severely impaired psychomotor development, failure to thrive, and spastic movement disorder predominantly of the lower limbs. Generalized tonic-clonic seizures in the first year of life and motor partial seizures secondarily generalized at the age of 8 years were treated with valproic acid. MRI brain at the age of 7 years showed severe white matter reduction with parieto-occipital predominance, and very thin corpus callosum. Myelin signal was detectable throughout the white matter with diffuse signal increase on T<sub>2</sub>-weighted scans affecting the periventricular region and U-fibres. Cerebellum appeared normal. Laboratory investigations, nerve conduction studies and electromyography were largely without pathologic findings. At the time of his last presentation at the age of 8 years key clinical features were severe intellectual disability and microcephaly, weak response to sensory stimulation, severe spastic movement disorder, axial dystonia, scoliosis, joint contractures of lower extremities, hips and elbows, growth retardation. Dysmorphological examination shows hypertelorism, long eyelashes, high-arched palate and anteverted nostrils. EEG showed slow background activity with epileptic abnormalities bilateral, diffusing to the whole left hemisphere.

**Individual F1:II.2** is a 7-year-old female, born to unrelated healthy parents from Algeria. Her elder brother (F1:II.1) is similarly affected, a younger brother is healthy. She was born at term with normal birth weight (length and head circumference not documented) and displayed muscular hypotonia. Head circumference documented at the 3<sup>rd</sup> week of life was -4.4 SD, body length at the age of 6 month -6.1 SD. At the age of 2 months secondary generalized partial motor seizures and generalized tonic-clonic seizures occurred every 10 to 15 days and were treated with valproic acid. Examination at 2 years of age showed microcephaly (-4.1 SD), spastic movement disorder predominantly of the lower limbs, and axial dystonia. The child does not follow the light well and has a low visual acuity, does not react to the call by her name. Dysmorphological examination shows big wide-eyed, thick eyelashes, long lashes, hollowed philtrum, anteverted nostrils, prominent upper lips, retrognathism, high-arched palate and short neck. Development remains stationary, without new achievements. Examination at the age of 7 years showed severe intellectual disability without expressive speech, she was unable to eat alone, had a growth retardation with a weight of 15 kg (-2.7 SD), length 97 cm (-4.5 SD), head circumference 43.5 cm (-5 SD) as well as impaired vision, spastic movement disorder, mild scoliosis, and joint contractures (knee, ankle). EEG showed poorly organized, slow background activity with focal and generalized epileptiform activity. Blood lactate was normal (2 mmol/l; ref.

range 0.70- 2.10) and CSF lactate elevated at 6.20 mmol/l (ref. range 0.89-1.66 mmol/l). Brain MRI at the age of 5 years showed a severe white matter volume reduction with parieto-occipital predominance and a thin corpus callosum. Myelin signal ( $T_2$ -weighted scans) was seen in the optic radiation, inner capsule, to some extent in central white matter, but not in U-fibres. Cerebellum appeared normal.

### **Family 2 (Infantile phenotype)**

**Individuals F2:II.1 and F2:II.3** are children of healthy parents who are 1<sup>st</sup> degree cousins of Iranian descent. They are currently 34 respectively 21 years old. Both individuals were born after an uneventful pregnancy by vaginal delivery. None of them showed dysmorphic features at birth. Parents realized motor problems in infancy at about 6 months of age in F2:II.1 and at about 2 months of age in F2:II.3 with motor weakness. Regression occurred in both individuals from the age of 3 years onwards. Both showed poor feeding and failure to thrive (body weight not available). They furthermore developed microcephaly (-4.6 SD resp. -5.3 SD at 18 years of life), progressive tetraparesis with severe spasticity and they never became ambulatory. Joint contractures of hand and feet were observed and they did not develop expressive language. They had a history of generalized tonic clonic seizures but are currently without antiepileptic treatment. Electrophysiological testing including nerve conduction studies and electromyography showed normal results. Laboratory testing regarding neurometabolic disorders has not been performed. A difference observed in these two brothers was that the younger individual F2:II.3 had two episodes of apnea and he was hospitalized for mechanical ventilation in childhood. Brain MRI of F2:II.3 at the age of 19 years showed extreme global white matter volume reduction with very thin corpus callosum accordingly. Myelin signal ( $T_2$ -weighted scans) was seen in the subcortical white matter but not centrally. No myelin signal was detected in the optic radiation or inner capsule. Cortex not clearly affected and the cerebellum was mildly atrophic but with normal myelination.

### **Family 3 (Infantile phenotype)**

**Individual F3:II.3** is a boy and third child of healthy parents who are 1<sup>st</sup> degree cousins of Turkish descent. He was born at term after a normal pregnancy by cesarean section. His neonatal period was normal. In the following months, he showed a normal development. He was able to hold his head on traction. He was feeding well. At the age of five months, the parents noted abnormal posturing of his arms and he was seen by a neuropaediatrician. An ultrasound examination of the brain revealed increased signal intensities of both thalami. At the age of six months he experienced an infection of the upper airways associated with fever and several neurological symptoms including an external ophthalmoplegia, significant truncal hypotonia combined with muscle weakness of all limbs and brisk deep tendon reflexes. He was admitted to a university hospital for further investigations. In the cerebral MRI marked signal hyperintensities in both thalami were confirmed (MRI images not available for review). Cerebrospinal fluid studies showed an elevated lactate of 2.74 mmol/l and alanine of 52  $\mu$ mol/l (<39.5  $\mu$ mol/l). A muscle biopsy examination including analysis of respiratory chain enzymes was performed revealing only unremarkable results. A repeat MRI scan of the brain 5 months later revealed a resolution of the signal intensities in both thalami (MRI images not available for review). Until the age of 2

years he developed a mild bilateral spasticity characterized by an increased muscle tone in particular of the lower limbs, increased deep tendon reflexes, and a positive Babinski's sign but age-appropriate cognitive skills. By the age of 2 years he was able to walk on his own. He was able to speak in short sentences with good language comprehension. At the age of 6 years his parents noted a mild decline of his motor skills without a preceding infection. He was only able to walk short distances and needed help to get up from the floor. At the age of 11 years he was still able to walk with a posterior gait walker and to ride a therapy bicycle. At that time his mother noted symptoms compatible with external ophthalmoplegia. Two months later he suffered from a viral throat infection which was followed by a dramatic worsening of his neurological condition with marked dysarthria and generalized weakness. He was admitted to a tertiary hospital. The neurological examination revealed an incomplete external ophthalmoplegia, truncal hypotonia, and profound muscular weakness. He was unable to stand or walk. His voice was very low-pitched and his speech dysarthric. In addition, he had three unprovoked tonic-clonic generalized seizures in one day. He further had an elevated blood pressure and an irregular breathing pattern characterized by very shallow and reduced frequency of breaths per minute with long interval combined with a marked hyperkapnia. At 11 years of age brain MRI (T<sub>2</sub>-weighted scans) showed multifocal cortico-subcortical signal changes as well as diffuse signal changes of the thalamus, mediodorsal thalamic nuclei, periaquaeductal grey, and extensively in brain stem with involvement especially of olivae, also involving lower pons. A small lactate peak was observed in the parietal lobe without clear contrast enhancement or diffusion changes. Spinal cord scans showed mild central T<sub>2</sub>-weighted signal hyperintensities, most pronounced in the cervical spine. CSF studies performed during this episode showed normal cell count, total protein, and lactate levels. CSF alanine was elevated with 34.2 μmol/l (range: 19.9-31.3 μmol/l). No intrathecal synthesis of IgG was detectable. Autoantibodies against neuronal antibodies such as NMDA-receptor were all negative. All aspects taken together an energy dependent metabolic disease was favoured but an autoimmune process could not be fully disregarded at the time. Therefore, high dose intravenous methylprednisolone therapy for three days was administered followed by a course of intravenous immunoglobulins. The cerebral MRI six days after the last study showed a significant improvement with T<sub>2</sub>-weighted signal alteration being less prominent in all regions and a lactate peak in the parietal lobe. Despite the radiological improvement the boy developed a respiratory insufficiency with respiratory rate of 8/min and a markedly elevated CO<sub>2</sub> leading to admission to intensive care unit and subsequent mechanical ventilation. Pneumonia due to *Mycoplasma pneumoniae* was diagnosed. After four days he was extubated and recovered rapidly in the following days. Another brain MRI 13 days later showed further receding T<sub>2</sub>-weighted signal changes, most prominent still in the brain stem, mediodorsal thalamus, and some cortical areas (mostly parietal left). He was discharged in stable condition and was referred to an in-house intensive rehabilitation program. MRI follow-up at the age of 11 5/12 years showed receding T<sub>2</sub>-weighted signal changes in the brain stem, abnormalities especially in frontal areas (olivae) and a new bilateral pathology in the posterior part of the inferior colliculi. MRI at the age of 11 10/12 years showed brain stem abnormalities as described above; signal changes in posterior part of inferior colliculi bilaterally appeared to be more prominent and in addition swollen, but without clinical worsening.

#### **Family 4 (Infantile phenotype)**

**Individual F4:II.1** is a 10-year-old male, born after normal pregnancy to healthy 1<sup>st</sup> degree cousins from Syria. He has three healthy younger siblings with one of them born preterm at 32 weeks of gestation. Another younger sister has clubfeet and finger contractures attributed to Xq11.2 duplication. A maternal uncle was reported to never have been ambulant without further explanation. Otherwise, the family history was unremarkable. The boy's development was initially unremarkable, with walking at the age of 1 year, normal speech development, continence in 2<sup>nd</sup> year of life and being able to run until about the age of 3 years. Then a developmental regression occurred with loss of ambulation at the age of 4 years and reduced active speech. Brain imaging at that point in the country of origin was reported to be without pathological findings (images not available for review). He developed a leg-dominated spastic motor disorder and showed a slow regression. Furthermore, intermittent nystagmus and pain at night were noted. After relocation to Germany, a neurodegenerative disease was suspected and diagnostics at the age of 7 years were initiated. Metabolic laboratory including lactate in CSF was unremarkable. Brain MRI showed on T<sub>2</sub>-weighted and Flair images cerebellar white matter signal changes in subcortical areas with lateral predominance; signal hyperintensities were also seen in the central brain stem, as well as mediodorsal thalamic nuclei, superior and inferior colliculi and mildly cerebellar pedunculi. Wernicke encephalopathy was suspected. With low normal vitamin B12 blood level a single dose of vitamin B12 was administered. One month later at the age of 7 5/12 years, he suddenly developed lethargy and consecutive central respiratory failure requiring mechanical ventilation. An emergency cerebral CT scan was unremarkable. After transfer to university hospital brain MRI showed no clear pathology except suspected signal changes in the mediodorsal thalamic nuclei, MR-spectroscopy was not clearly abnormal. Extensive diagnostics were without pathological findings. CSF neurotransmitters showed slightly elevated homovanillic acid and 5-hydroxyindole acetic acid levels and low tetrahydrobiopterin, whereas urinary pterins were later to be found normal. A thiamine transporter-2 deficiency was suspected and treated with thiamine and biotin. After recovery from respiratory failure further developmental regression occurred. Follow-up MRI at the age of 8 2/12 years showed hyperintense T<sub>2</sub>-weighted signal changes of the central cerebellar white matter and brain stem (olivae) as well as inferior colliculi. Spine appears normal, MRS with lactate peaks. Another MRI performed at the age of 8 3/12 years after head concussion displayed a more marked pathology with more extensive cerebellar white matter signal changes, changes in central anterior brain stem and swelling of inferior colliculi (extending to superior colliculi), here also suspected contrast enhancement. Electrophysiology studies eventually demonstrated severely reduced motor and slightly reduced sensory nerve conduction velocity. An abnormal variation in muscle fibre diameter was found. Biochemical investigations revealed complex I/IV-deficiency in muscle but not in fibroblasts. At the current age of 10 years, the boy shows leg-dominated spastic motor disorder with knee contractures, mild intellectual disability, speech disturbance, visual disturbance with convergent strabismus, incontinence, obese body stature with prediabetes and suspected lipoedema.

### **Family 5 (Infantile phenotype)**

**Individual F5:II.2** is a 22-year-old male with intellectual disability, motor impairments, and epilepsy born to unrelated parents from Canada. He had a younger brother who passed away at 6 weeks of age after rapidly deteriorating from an unknown illness. At day 4 of life, individual F5:II.2 developed feeding issues and experienced a 15 minute long seizure of unclear etiology. He experienced developmental delay of motor milestones and began showing spasticity in the lower limbs as well as truncal hypotonia. Development of language acquisition was also delayed and he has intellectual disability, which appears severe but was not formally tested. At age 2 years the individual had surgery to address esotropia in both eyes. Spasticity in the lower limbs progressed to the point that he required surgery at age 3 years to release adductors in both legs. One month post-surgery, the individual was admitted to the hospital for one hour long febrile status epilepticus. At age 4 years the individual had surgery to release both heels. MRI at the age of 5 years revealed a right mesial temporal spherical lesion (9 x 11 mm) that did not enhance with gadolinium. This lesion did not enlarge with subsequent MRIs. There was also generalized diminished volume of the white matter with thinning of corpus callosum. By age 9 years, his mobility continued to decline and he received frequent botulinum toxin injections. His EEG at age 12 years showed frequent focal and generalized epileptiform discharges, maximally in the bilateral frontocentral areas. The background was in the theta range, which was slow for age. By age 14 years, he could commando crawl and roll over. Brain MRI at age 14 years revealed a new T<sub>2</sub> hyperintense lesion in the left middle cerebellar peduncle measuring 11 mm. This lesion was also stable in size. The MRI of the whole spine was normal. Ultrasound of the abdomen revealed no gross organomegaly. A swallow study done at age 17 years showed silent aspiration. Repeat EEG at age 18 years showed slow background (theta range) but no epileptiform discharges were identified. Currently, at the age of 22 years, he has severe bilateral lower limb spasticity and ankle clonus with his left side worse than right. Deep tendon reflexes in the upper limbs were within normal limits. His head circumference was 56.5 cm (84 percentile). His weight was 84.5 kg (83 percentile) and length approximately 152 cm (-3 SD). His other medical conditions include restless leg syndrome. He speaks in 2-word sentences and can sign 30 words. His medications include carbamazepine, phenobarbital, gabapentin, baclofen, trazodone, and melatonin. Lactate was elevated in blood (4.3 mmol/l), further investigations into inborn errors of metabolism including plasma amino acid, urine organic acids, and ammonia were normal. Blood work for coagulopathy and immunoglobulins were normal. Genetic testing including chromosomal microarray, Rett syndrome, and Angelman syndrome were unremarkable.

### **Family 6 (Infantile phenotype)**

**Individual F6:II.1** is a currently 5-year-old boy born to unrelated parents from Germany. He has a healthy younger sister and a similarly affected younger brother (individual F6:II.3). Epilepsy was reported in the father's childhood and in a paternal uncle since adolescence, otherwise family history is unremarkable. After a normal pregnancy, the boy was born at term with microcephaly (33 cm, 4<sup>th</sup> percentile). Excessive crying, muscular hypertonia and prolonged sleep duration were noted. At the age of 3 weeks cyanotic apneas led to hospitalization and extensive diagnostics after transfer to a university hospital. Lactate was elevated in blood (4.0 mmol/l,

normal range: 0.5-2.2 mmol/l) and CSF (6.9 mmol/l, normal range: 1.1-2.8 mmol/l), as was alanine in blood (501  $\mu$ mol/l; normal range: <439  $\mu$ mol/l) and CSF (91.1; normal range 13.8-32.6  $\mu$ mol/l). Brain MRI showed dysgenesis of the corpus callosum and unilateral small punctiform lesions of the left basal ganglia with diffusion restriction. A few days later brain ultrasonography revealed increased echogenicity of the thalami and periventricular region interpreted as focal oedema. Apneas were interpreted as seizures without distinct EEG alterations and treated with phenobarbital and subsequently levetiracetam, leading to clinical stabilization. A small muscular ventricular septal defect was detected. Repeat brain MRI at 7 weeks of age showed little myelin signal on T<sub>2</sub>-weighted scans (only posterior pons shows low signal), white matter appeared abnormally hyperintense but without diffusion changes. Focal T<sub>2</sub>-weighted signal alterations were observed in the left caudate head and lateral ventricles were mildly enlarged. Corpus callosum appeared reduced in volume and a subsequent MRI at 15 months of age showed a reduction in the parieto-occipital white matter volume with enlargement of ventricles and a volume loss of the corpus callosum. Posterior limb of the internal capsule, optic radiation, central white matter, and splenium showed some myelin signal on T<sub>2</sub>-weighted images. Myelination appeared normal infratentorially. In the further course progressive microcephaly (-3.25 SD), failure to thrive (-2.85 SD), growth retardation (-2.63 SD), global developmental delay, mild intellectual impairment, bilateral spasticity of the lower limbs, dysarthria, sialorrhoea, incontinence, hyperopic visual impairment, and nystagmus occurred. Surgical procedures regarding herniotomy, hydrocele testis and hip surgery were required. Currently he can crawl and pull himself into kneeling upright, uses his wheelchair actively, grasps, eat with his hands, drink through a straw, differentiate known and unknown persons, objects and situations, communicates by looking and gesturing, but cannot verbalize. Genetic diagnostics were unremarkable including chromosomal analysis, array-CGH and mitochondrial genes including Leigh syndrome-associated variants.

**Individual F6:II.3** is a currently 1 7/12 years old boy and the brother of individual F6:II.1 (see above). Pregnancy was uneventful and he was born at term with normal weight, length and head circumference without any postnatal issues. Routine brain ultrasonography showed mild ventriculomegaly. He presented in the 2<sup>nd</sup> month of life with cyanotic apneas that led to hospitalization and transfer to university hospital. Ongoing apneas required intermittent non-invasive ventilation resp. nasal high flow treatment and medication with caffeine citrate. Laboratory diagnostics showed elevation of lactate in blood (7.9 mmol/l, normal range: 1.1-2.3 mmol/l) and CSF (8.2 mmol/l, normal range: <2.1 mmol/l) as well as alanine (blood 828 resp. CSF 73.6  $\mu$ mol/l (normal range: 23.0-39.5  $\mu$ mol/l). Urinary organic acids showed lactate, fumarate, malate elevated and pyruvate slightly elevated. Other metabolic investigations including acylcarnitines, neurotransmitters and FGF21 did not reveal significant changes. Brain MRI at the age of 6 weeks showed no myelin signal (T<sub>1</sub>- and T<sub>2</sub>-weighted images), enlarged ventricles, white matter signal appeared highly abnormal (T<sub>2</sub>-weighted hyperintensities); anterior putamen and head of caudate bilaterally showed hyperintensity on T<sub>2</sub>-weighted scans without diffusion changes; MR-spectroscopy revealed a clearly abnormal lactate signal in this region. Corpus callosum appeared reduced in volume. Due to these findings and family history a mitochondrial disease was suspected and vitamin-cofactor therapy was started with

ubidecarenone, biotine, thiamine and riboflavin. In polysomnography prolonged central apneas (duration >5.5 s: mean 17.3 s, maximal 67.5 s; 5.2 s n/h) were detected with preceding global spindle oscillations. Although EEG diagnostics were largely unremarkable recurring severe apneas were assumed to be seizure-related and treated with levetiracetam. Only after addition of topiramate apneas ceased. Elevation of lactate and alanine quickly normalized. Echocardiography showed a normal function with a slightly enlarged left ventricle (LVIDD 26 mm) and a prominent septal wall thickness (IVS 4-4.5 mm). Sucking weakness required feeding via naso-gastric tube. Three weeks after admission the individual was stable enough for discharge. At follow-up with 4 months of age parents reported excessive crying lasting shortly after discharge as well as ongoing seizures, feeding problems with regurgitation, sensitivity to stress and intermittently impaired visual function. Gain of body weight, length and head growth was inadequate leading to secondary microcephaly (38 cm; -2.61 SD). Overall neurologic development was not adequate with muscle stiffness, clenched fists, tendency to opisthotonic posturing. EEG showed multifocal spikes bifrontally. Follow-up at 7 months of age showed developmental progress, unchanged EEG alterations, no lactate elevation in blood, urine and CSF and fewer central apneas in sleep study. MRI brain showed significant white matter volume reduction and ventricular enlargement with predominance parieto-occipital and significant volume loss of corpus callosum. Posterior limb of the internal capsule (PLIC) and optic radiation showed some myelin signal on T<sub>2</sub>-weighted images, cerebellar white matter was myelinated. Basal ganglia appeared normal without clear signs of signal alteration or atrophy. Muscle biopsy did not show histopathologic changes. Enzymatic analysis of mitochondrial respiratory chain complexes showed marginally reduced complex I and reduced complex IV activity in snap-frozen muscle specimen and complex II, III, IV and V activities above upper limit in fibroblasts. No further episodes of metabolic decompensation occurred and medication was stepwise reduced to levetiracetam and ubidecarenone only. At the last follow-up at 19 months of age microcephaly was more pronounced (43.7 cm; -4.2 SD), axial hypotonia and increased muscular tone with spasticity of predominantly the legs were present, feeding problems partly persisted. Munich Functional Developmental Diagnostics (MFDD) showed the following developmental ages: crawling 3 months, sitting 4-6 months, walking 5 months, gripping 5-6 months, speaking 3-4 months, perception 5 months, social skills 6 months. Seizures with fencing reflex-like movements occurred daily in clusters, EEG showed multifocal spikes and spike-waves predominantly in the temporal and focal regions, leading to additional treatment with oxcarbazepine.

### **Family 7 (Infantile phenotype)**

**Individual F7:II.2** is a boy and the second of three children of German ancestry. An older and a younger sister as well as both parents do not have any health concerns. During pregnancy, the mother felt less child movements in comparison with her other pregnancies. Due to breech position, he was born by caesarean section in the 39<sup>th</sup> week of gestation. Birth weight was normal, head circumference 40 cm (+3.4 SD), APGAR scores 9-10-10 and he had an uncomplicated adaptation and neonatal course. At the age of 6 weeks his parents observed short episodes with decreased consciousness followed by short uncontrolled movements while breastfeeding. EEG determined that these were epileptic seizures and he was treated with



phenobarbital and levetiracetam. CSF lactate was mildly elevated 3.8 mmol/l (no serum lactate levels available), plasma amino acids showed mildly elevated serine and citrulline and CSF amino acids showed mildly elevated alanine and methionine. Urinary organic acids and acylcarnitines in dried blood spot as well as CSF neurotransmitters were unremarkable. Brain MRI at the age of 2 months showed no myelin signal (T<sub>1</sub>- and T<sub>2</sub>-weighted), white matter signal appeared highly abnormal, especially in the frontal area (T<sub>2</sub>-weighted hyperintensities); putamen and head of caudate bilaterally appeared swollen and showed hyperintensity on T<sub>2</sub>-weighted scans without diffusion changes. Corpus callosum was somewhat reduced in volume. Investigation of a muscle biopsy showed mild fibre type disproportion and possibly enlarged mitochondria, staining for NADH, COS, Cox-SDH and Gomori-Trichrom was unremarkable. Investigation of the respiratory chain enzymes (I, I+II, II, II+II, IV, V, PDHc) was unremarkable in fresh muscle, some of the substrate oxidation rates showed mild changes without a clear pathogenic pattern. Investigation of the respiratory chain enzymes in fibroblasts showed activities of complex I-IV above the upper limit. Since then no more seizures occurred and phenobarbital was stopped after 6 months and levetiracetam after 18 months. Brain MRI at the age of 12 months showed no significant white matter volume reduction or ventricular enlargement. Myelination was delayed, only PLIC and optic radiation showed some myelin signal on T<sub>2</sub>-weighted images, cerebellar white matter myelinated. Basal ganglia appeared normal without clear signs of signal alteration or atrophy. The boy showed a delayed development, he learned crawling by the age of about 3 years and pulled himself to standing since the age of 2 6/12 years. At the age of 4 years he showed growth retardation with a length of 92 cm (-2.7 SD), weight 13 kg (-2.0 SD), and was microcephalic (-2.5 SD). He is currently aged 5 years and cannot sit or stand independently, but can move himself around in a wheelchair or with a walker. He cannot speak words and is currently learning to communicate with gestures. The parents report a very slow gaining of motor and verbal skills but no regression. The physical examination at the same age shows a friendly and cooperative boy, interacting with his parents and the examiner. He has a long philtrum and low implanted ears. He shows severe axial hypotonia with good head control. The muscle tone of the upper limbs is mildly elevated with elbow contractures; the muscle tone of the lower limbs is clearly increased with pes equinus. He has decreased facial expression, shows intermittend esotropia and an open mouth with continuous drooling. Compound-heterozygosity of the detected *HPDL* variants was apparent from the exome data due to close proximity of the variants with sequencing reads showing either one or the other change. Carrier testing showed that the change on the paternal allele occurred *de novo*.

### **Family 8 (Infantile phenotype)**

**Individual F8:II.1** is a currently 2 3/12-year-old boy born after normal pregnancy per caesarean section (malposition) and postnatal adaption was unremarkable. He is the first child of healthy unrelated parents from Germany. The mother had had two spontaneous abortions (each at 16 weeks of gestational age, the first diagnosed as heterotaxia, heart defect; the second as partial trisomy 21). Birth measurements were within normal range (length 54 cm, head circumference 34 cm, birth weight 4150 g). At the age of 5 months, a delay in motor development was noticed and neurological examination revealed truncal hypotonia and increased tendon reflexes. Brain

MRI showed multifocal and confluent signal changes bilaterally (hyperintensities on T<sub>2</sub>-weighted scans and with some moderate ADC decrease) of basal ganglia (nucleus caudatus and putamen); myelination low normal (optic radiation, PLIC, central white matter, cerebellar white matter showed low T<sub>2</sub>-weighted signal). Laboratory testing was normal apart from increased lactate concentrations in plasma (4.3 mmol/l, normal range: <2 mmol/L) and cerebrospinal fluid (CSF; 3.3 mmol/L, normal range: <2 mmol/L). At the age of 7 months, he developed an intermittent strabismus divergens but made otherwise good developmental progress. At the age of 13 months, he still had limited motor control of head and trunk. Brain MRI showed no new lesions, good progress in myelination and consolidation of the formerly detected lesions (only minor signal changes in caudate and putamen, no significant atrophy). There was no sign of increased lactate in spectroscopy and concentrations were normal in plasma and CSF. Biochemical analysis of a skeletal muscle specimen showed normal function of isolated mitochondrial respiratory chain complexes and PDHc, but a globally reduced mitochondrial respiration indicating a possible defect in cofactor metabolism or dysfunction of the mitochondrial membrane. Histological workup showed no ragged red fibers or COX-negative fibers but an abnormal variation in muscle fiber diameter compatible with motor neuron impairment. Supplementation with biotin, coenzyme Q and thiamine was started at the age of 13 months. At last examination, the individual showed good overall developmental progress, but an increasing spasticity of the lower limbs. On follow-up at age 2 3/12 years, he displayed low body weight (9.8 kg; -2.6 SD), low length (79 cm; -3.14 SD) and low head circumference (47.2 cm; -2.2 SD) but had made developmental progress without deterioration during infections. He grasped, crawled, vocalized and understood simple language. He showed leg dominated spasticity with increased tendon reflexes.

### **Family 9 (Infantile phenotype)**

**Individual F9:II.1**, a currently 8-year-old girl, is the first child of healthy unrelated parents from Germany. Pregnancy and postnatal adaptation were normal. She reached motor and cognitive milestones in time and walked without aid at 12 months of age. She was an active child and regularly took part in track and field training. At age 5 years, she started complaining about sore legs after exercise. At age 5 2/12 years, her gait became unsteady and parents sought medical advice. Clinical examination revealed increased muscle tone and tendon reflexes of the legs, with a positive Babinski sign. Eye movements and neurological exam of the arms were normal, there was neither ataxia nor dystonia. Cranial MRI was normal, spinal MRI was first reported as possibly abnormal with suspicion of long extended central signal changes (T<sub>2</sub>-weighted) of the spinal cord. In view of this finding, she was started on prednisolone without improvement. A control MRI two weeks later was normal and in retrospect the possible abnormalities on the first MRI were interpreted as pulse artefacts. CSF cell count was 1/μl, CSF protein 0.19 g/l, CSF lactate 2.36 mmol/l (normal range: 1.1-1.9 mmol/l). Plasma aminoacids were normal as were lactate and pyruvate in serum and both liver and kidney function tests. Treatment with L-dopa did not lead to a definite improvement. At age 6 6/12 years she lost free ambulation and neurogenic bladder dysfunction was noted. Genetic testing revealed a heterogeneous stop variant of the *SLC52A3*. Since recessive-type *SLC52A3* variants lead to Brown-Vialetto-van Laere syndrome, a trial with riboflavin supplementation was performed at age the age of 7 years

over a period of 6 months (2 x 100 mg per day) which had no clinical effect. Up from the age of 8 years, fine motor function of her upper limbs deteriorated and dysarthria was observed. Parents also noted learning difficulties. Currently, at an age of 8 5/12 years, she attends a special needs school and needs a writing aid.

#### **Family 10 (Juvenile phenotype)**

**Individual F10:II.1** is a male born after unremarkable pregnancy and delivery to unrelated parents from USA. He had normal pediatric development and cognition. At the age of 15 years he came to clinical attention for back pain after increased exercise and unsteady gait. MRI of the brain was reported normal (MRI imaging not available for review). At most recent clinical evaluation, the individual was aged 17 years and had experienced progression of gait disturbance and stiffness. No other system involvement was reported. The individual was given a diagnosis of presumed hereditary spastic paraplegia.

#### **Family 11 (Juvenile phenotype)**

**Individual F11:II.1** is a currently 20-year-old female. Her parents are 1<sup>st</sup> degree cousins from Turkey. The father suffers from myalgia, with muscle cramps and CK-elevation, but without spasticity. Similar muscular symptoms were also reported for the father's brother and sister, as well as his mother and her brother. The affected individual was born at term after normal pregnancy with neonatal jaundice requiring phototherapy. According to the parents all developmental milestones were reached, only a mild inward rotation of the left leg was observed from the age of 2 years on. Running and cycling was possible until teenage years. The woman reported on the onset of gait disturbances at the age of 15 years with progressive spasticity and paraparesis. Muscle cramping and myalgia limited the maximum walking duration to about 5 minutes. The maximum walking distance without pause is reduced to below 500 m. Moreover, she complained about intermittent paraesthesia of the calves. Occasional dysphagia without dysarthria and impaired short-term memory with attention deficits were reported. She did not take any regular medication apart from vitamin B12 and D supplements. At the age of 13 years an endocrine examination of sexual hormone levels was performed to clarify irregular menstrual cycles. The LH/FSH quotient was shifted, estradiol was slightly reduced, dihydrotestosterone was elevated. However, treatment was not initiated. Menstrual cycles are still irregular. The woman graduated from secondary school and is now in training for office management. Clinical examination revealed paraparesis with spasticity and increased reflexes in the lower limbs and weak reflexes in the upper limbs with a positive Babinski sign. A mild gait ataxia was observed but no signs of fine motor or sensory impairment. In addition, a syndactyly of the second and third toe on both feet up to the first interphalangeal joints, as well as a slightly abnormal position of the proximal phalanges of the index fingers were observed. The woman showed an obese body stature with a BMI of 34.9 kg/m<sup>2</sup> and suspected hirsutism. Functional testing resulted in SARA 6/40, ICARS 14/100, SPRS 10/52. Laboratory tests showed a slight elevation of CK 4.1  $\mu$ kat/l (<2.8), myoglobin 69 ng/ml (25-58) and homocysteine 18.5  $\mu$ mol/l (<12.0). Lumbar puncture was not performed. MRI imaging of the brain and spine showed no clear pathology. Nerve conduction studies and EMG revealed no abnormalities.

### **Family 12 (Juvenile phenotype)**

**Individual F12:II.3**, a male, was the third child of healthy 1<sup>st</sup> degree cousins of Syrian origin. He had four healthy siblings. Development in childhood was normal up to the age of 15 years when gait disturbances became evident. Neurological examination revealed brisk reflexes of the arms and increased reflexes of the legs with a positive Babinski sign bilaterally. There was a bilateral spastic paresis of the legs with proximal predominance MRC (Medical Research Council) grade 3-4/5. Sensory functions and bladder function were normal. MRI examinations showed brain and spinal cord without signal alterations or malformations. CSF examinations were unremarkable. In the following years spastic paraparesis was progressive thus the individual was not able to walk independently any more at age of 19 years. However, no weakness of the arms occurred. At age of 19 years the individual presented at our university hospital for the first time. Medical history was compatible with pure hereditary spastic paraplegia with a possible autosomal recessive mode of inheritance.

### **Family 13 (Juvenile phenotype)**

**Individual F13:II.1** is a currently 39-year-old male and the first child of non-consanguineous parents from Turkey (near the Syrian border). He has two other siblings, one of whom (F13:II.2) is affected as well. The individual's medical history shows myopia and gastrointestinal reflux. A brain MRI was performed in adolescence as part of the diagnostic work-up of his walking problems and as an incidental finding a pituitary adenoma was diagnosed. It was removed transnasally a few years later because it was progressive in size. Similar to his brother, he had a normal development in childhood and was very active during his early adolescence. At the age of 14 years he had a period of immobilization due to an operation of a clavicular fracture. He then noticed for the first time a slowly progressive weakness of his left leg as well as fatigue. Later there was also slowly progressive paraspasticity, accompanied by muscle cramps and gait instability. Additionally he complained of a deterioration of the paraparesis after a walking distance of 2-3 km. Recently he noticed a mild bladder urgency. At his last presentation at the age of 28 years he showed a paraparesis and paraspasticity of the legs, increased reflexes of the legs and a spastic-atactic gait, suggestive of a pure hereditary spastic paraplegia phenotype, spastic paraplegia rating scale (SPRS) 7. Genetic testing of SPG4 and SPG7 were negative.

**Individual F13:II.2** is a currently 33-year-old male and the second child in family 13. He has a healthy 3-year-old daughter. He reported a normal development in childhood and was reportedly physically very active during adolescence. At the age of 15 years during a period of increased physical activity during a soccer game he experienced a sudden "blockage" of his muscles accompanied by spasticity and paraparesis. Since then chronic-progressive deterioration of spasticity and gait instability without any sudden deterioration were observed. He also complained of recurrent muscle cramps and lumboischialgia. Physical examination at the age of 22 years showed a paraspasticity and a spastic-ataxic gait with increased reflexes of the legs. Spastic paraplegia rating scale (SPRS) was 17. Nerve conduction studies revealed no abnormalities, but delayed motor-evoked potentials were found. Medical history was suggestive of pure hereditary spastic paraplegia with an autosomal recessive mode of inheritance. Testing of HSP-related genes (SPG 5a, 7, 11) was negative.

## SUPPLEMENTAL FIGURES AND LEGENDS

Figure S1

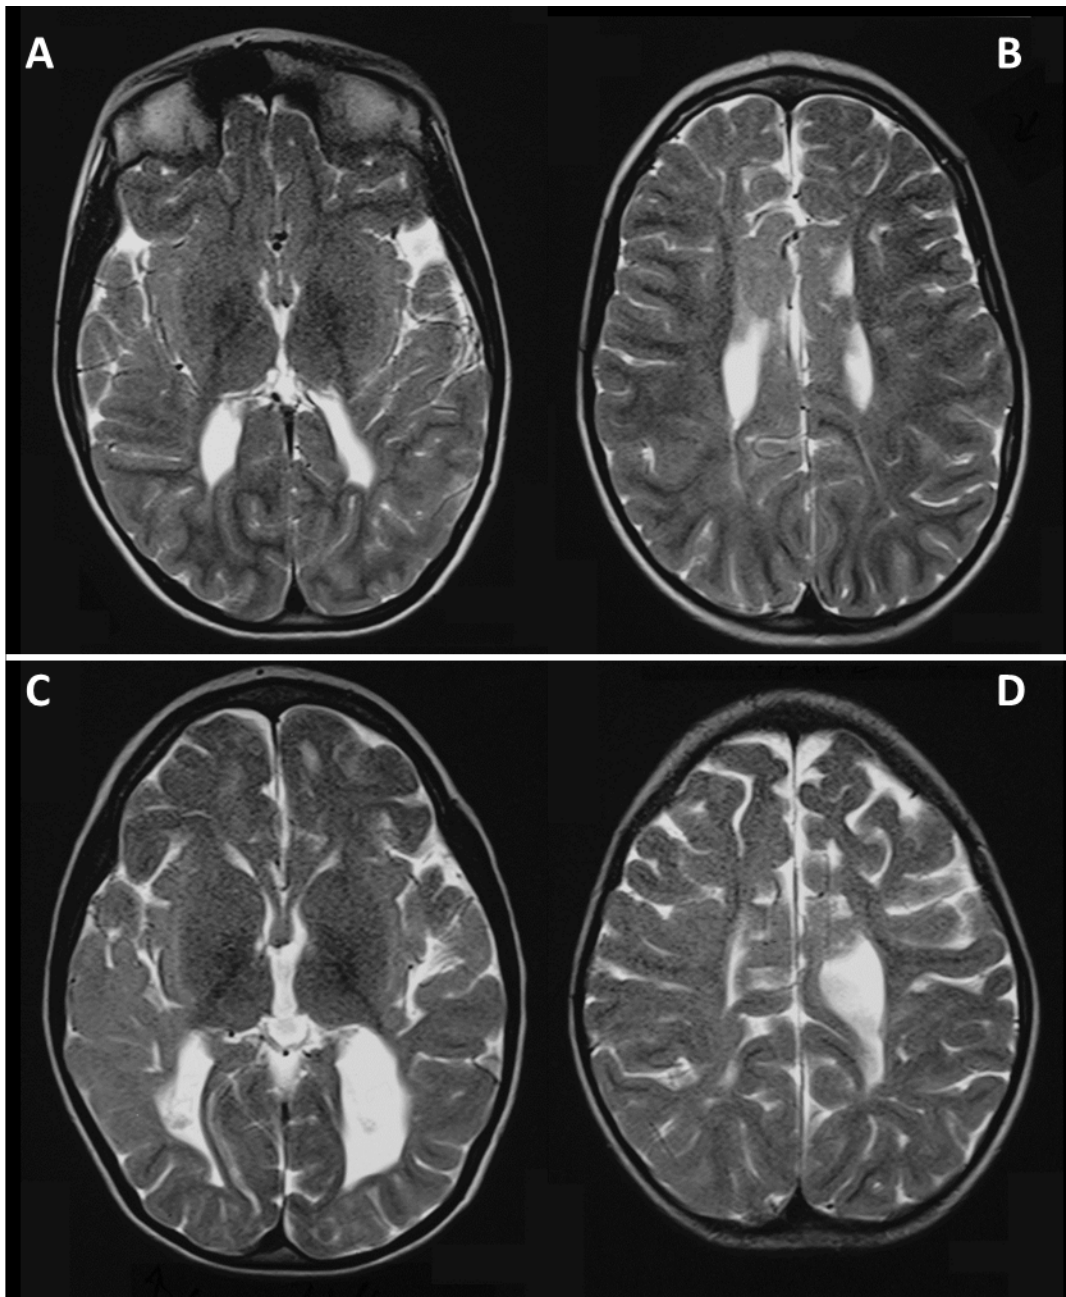

### Figure S1. MRI Pattern I Suspected.

MRI ( $T_2$ -weighted axial scans) from individuals F1:II.1 (aged 7 years, A, B) and F1:II.2 (aged 5 years, C, D) show severe white matter volume reduction with parieto-occipital predominance. Accordingly the lateral ventricles are of irregular shape and the corpus callosum is very thin. Myelin signal of white matter shows diffuse signal increase concerning periventricular region and U-fibres. Summary of both individuals: White matter volume reduction suspicious of atrophy, myelination delayed.

Figure S2

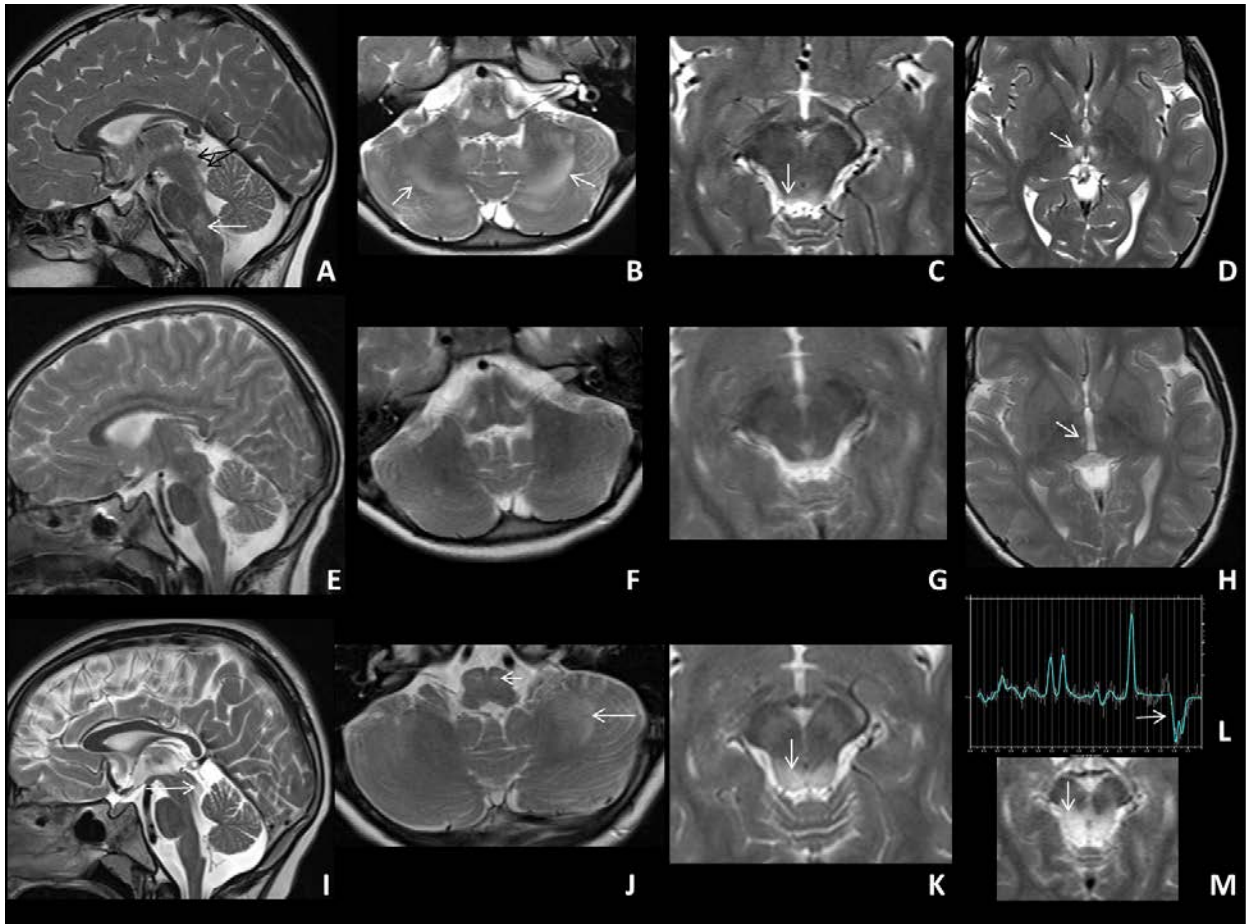

**Figure S2. MRI Pattern II (continued from Figure 4).**

MRI (T<sub>2</sub>-weighted sagittal and axial scans) and MRS from individual F4:II.1

At the age of 7 4/12 years (A - D) signal hyperintensities are seen in the brain stem centrally (white arrow in A) and in the cerebellar white matter in subcortical areas with lateral predominance (white arrows in B). Superior and inferior colliculi show mild signal changes (black arrows in A, arrow in C). Mediodorsal thalamic nuclei show clear signal changes (arrow in D).

One month later at the age of 7 5/12 years (E - H) no clear pathology is evident except suspected signal changes in the mediodorsal thalamic nuclei (arrow in H).

At the age of 8 2/12 years (I - L), hyperintense signal changes are evident in the inferior colliculi (arrows in I, K). The central cerebellar white matter again is mildly hyperintense (arrow in J), as are the olivae (small arrow in J). Two months later, inferior colliculi appear even more hyperintense and swollen (arrow in M).

Summary: relapsing remitting course with initial changes in cerebellar white matter, mediodorsal thalamic nuclei, superior and inferior colliculi, showing remission, but relapsing with swelling of the inferior colliculi and additional brain stem changes.

Figure S3

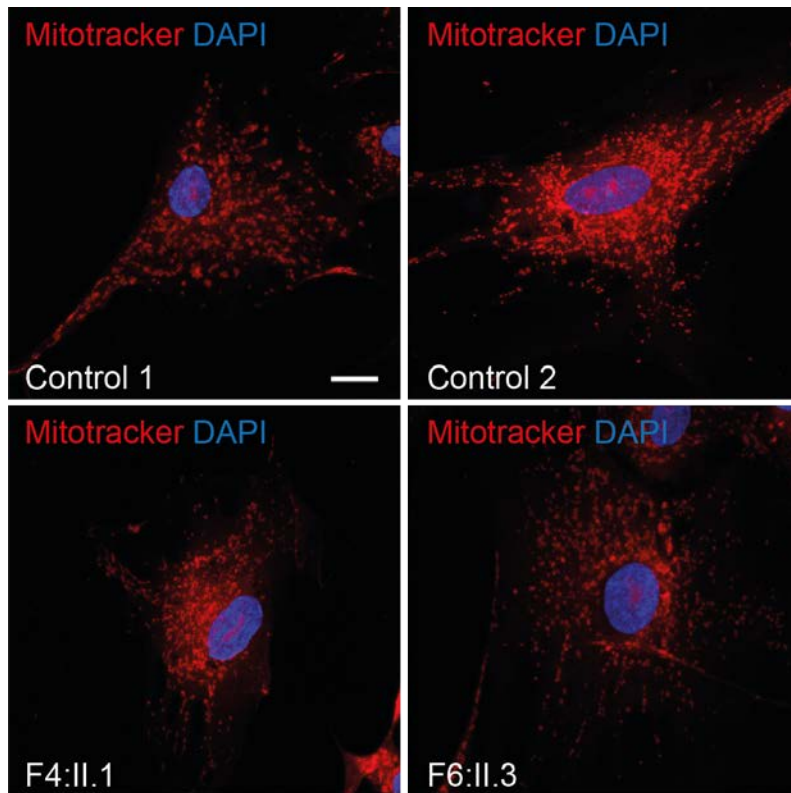

**Figure S3. Investigation of Mitochondrial Morphology.**

Analysis of the mitochondrial network visualized by Mitotracker Red CMXRos staining in fibroblasts from affected individuals and controls did not show significant differences. Fibroblasts from individuals (F4:II.1, F6:II.3) and controls (n=2) were grown on coverslips to near-confluency, incubated with 100 nM Mitotracker Red CMXRos (Invitrogen) in medium for 45 minutes at 37 °C and fixed with methanol at -20 °C for 15 minutes. DAPI staining (Invitrogen) was performed according to the instructions of the manufacturer. Fixed cells were mounted with Fluoromount G (Southern Biotech) and were analyzed with a Zeiss LSM 880 confocal microscope. Scale bar = 20  $\mu$ m.

Figure S4

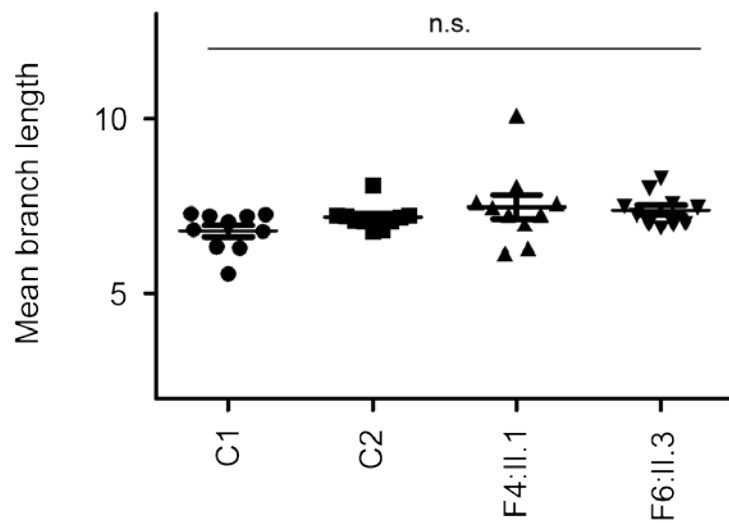

**Figure S4. Analysis of Mean Mitochondrial Branch Length.**

Analysis of the mitochondrial morphology using mean branch length as a parameter did not show significant differences between fibroblasts from affected individuals and controls. Methods see Figure S3. Mitochondrial morphology was analyzed with Fiji<sup>2</sup> using the Mitochondrial Network Analysis Tool (MiNA).<sup>5,6</sup> n = 10 replicates per sample.



Figure S5

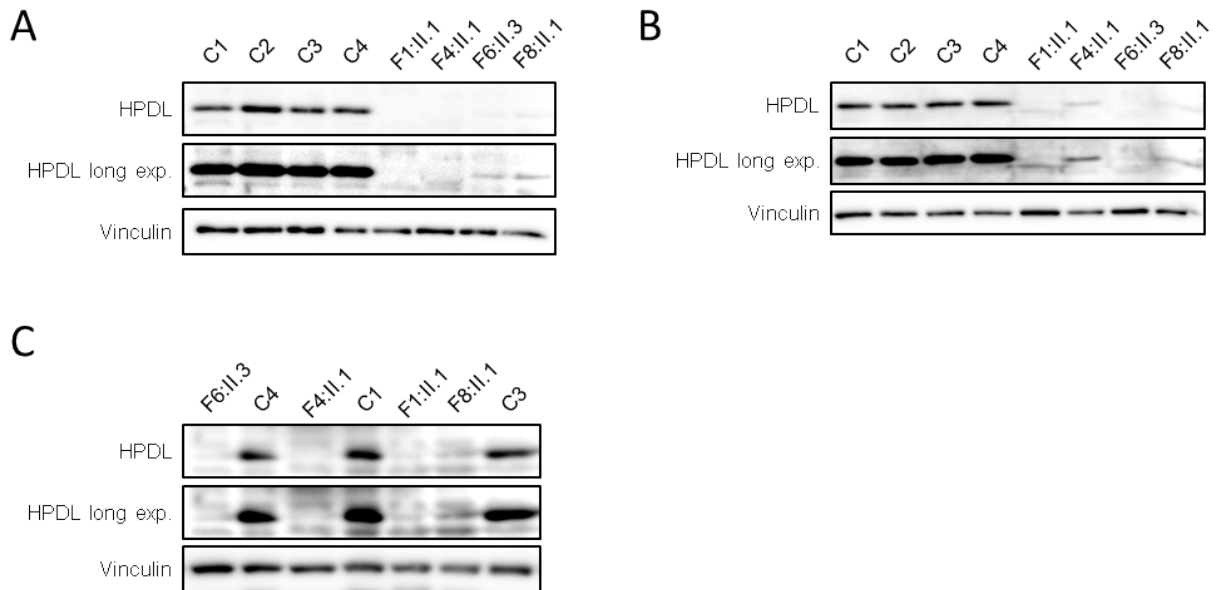

**Figure S5. Relative HPDL Levels in Fibroblasts of HPDL-Deficient Affected Individuals Compared to Controls.**

Whole cell lysates from fibroblasts of affected individuals (F1:II.1, F4:II.1, F6:II.3, F8:II.1; n=4) and controls (n=3 resp. n=4): After harvesting by scraping, cells were re-suspended in RIPA buffer (50 mM Tris/HCl (pH 8.0), 150 mM NaCl, 1 mM EDTA, 1 % Triton X-100, 1 % sodium deoxycholate and 0.1 % SDS) supplemented with PhosphoStop (Roche) and protease inhibitor cocktail (Roche), followed by brief sonication in a Bioruptor (Diagenode) (5 cycles with 30 s on and 30 s off with high intensity at 4 °C). Protein quantification was done with the Pierce BCA Protein Assay Kit (Thermo Fisher). Immunoblotting: All samples were diluted 5:1 in 6 x SDS-sample buffer (35 %  $\beta$ -mercaptoethanol, 350 mM Tris/HCl pH 6.8, 30 % glycerol, 10 % SDS, 0.25 % bromophenol blue) and heated at 95 °C for 7 min. 25 mg of protein per lane were separated by standard SDS-PAGE on polyacrylamide gels and transferred onto PVDF membranes. After blocking in blocking solution (BS; TBS pH 7.25, 5 % dry milk and 0.05 % Tween-20), membranes were incubated with primary antibody against HPDL (1:1000 diluted in BS; Proteintech). Equal loading of protein was verified by the detection of Vinculin (1:5000; Santa Cruz). Peroxidase-conjugated anti-rabbit (1:5000; KPL SeraCare) secondary antibody (diluted in BS) was used for detection of specific signals with Pierce ECL Western Blotting Substrate (Thermo Fisher) and Western Bright Sirius HRP substrate (Advansta) on an Amersham Imager 600 (GE Healthcare Lifesciences). Three independent experiments (A – C) were performed. The immunoblot of HPDL is displayed at normal exposure and overexposed (long exposure (exp.)) to show remaining HPDL levels in HPDL-deficient affected individuals' fibroblasts. Figure S5 panel A shows parts of Figure 2 panel A for better comparability.

Figure S6

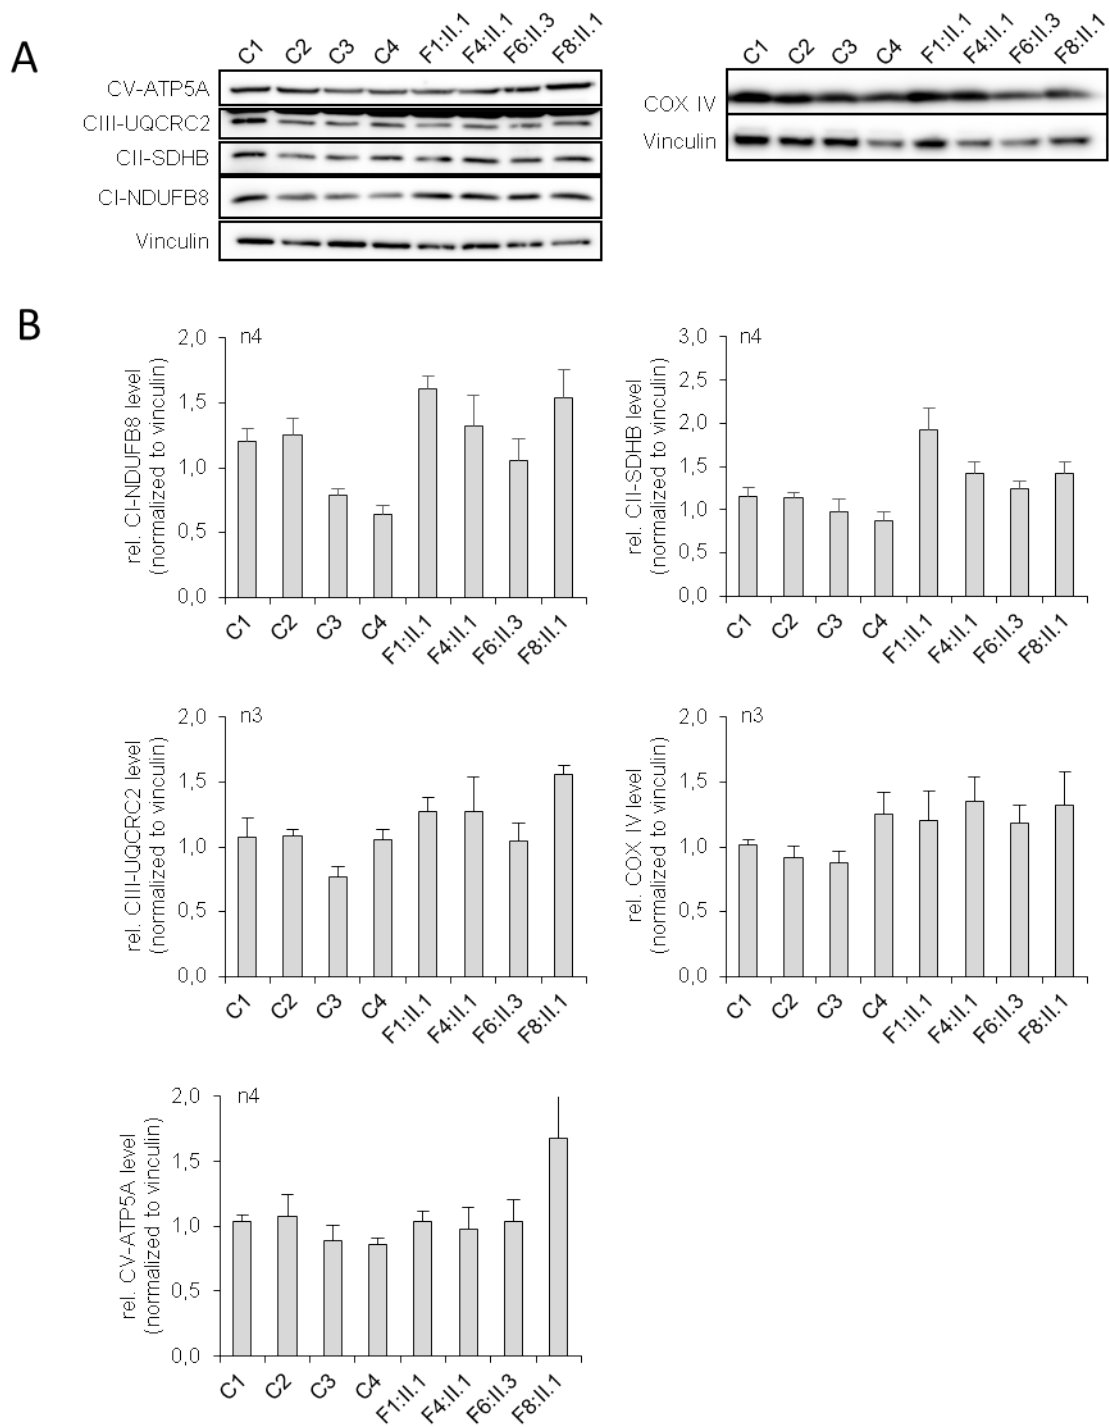

**Figure S6. Relative Protein Levels of OXPHOS Complex Subunits in Fibroblasts of HPDL-Deficient Affected Individuals Compared to Controls.**

(A) Whole cell lysates from fibroblasts of affected individuals (F1:II.1, F4:II.1, F6:II.3, F8:II.1; n=4) and controls (n=4) were prepared and analyzed by SDS-PAGE and immunoblot as described in Figure S5. Membranes were incubated with primary antibodies against total OXPHOS rodent WB antibody cocktail (complex V subunit ATP5A, complex I subunit NDUFB8, complex III subunit UQCRC2, complex II subunit SDHB, 1:2500 diluted in BS; Abcam), complex IV subunit COX IV (1:5000 diluted in BS; Abcam). Equal loading of protein was verified by the detection of Vinculin. Peroxidase-conjugated anti-mouse (1:5000 diluted in BS; KPL SeraCare) secondary antibodies were used for detection of specific.

(B) Protein levels were quantified using ImageJ (NIH). The graphs display the average of 3-4 individual experiments (n3, n4)  $\pm$  SEM.

Figure S7

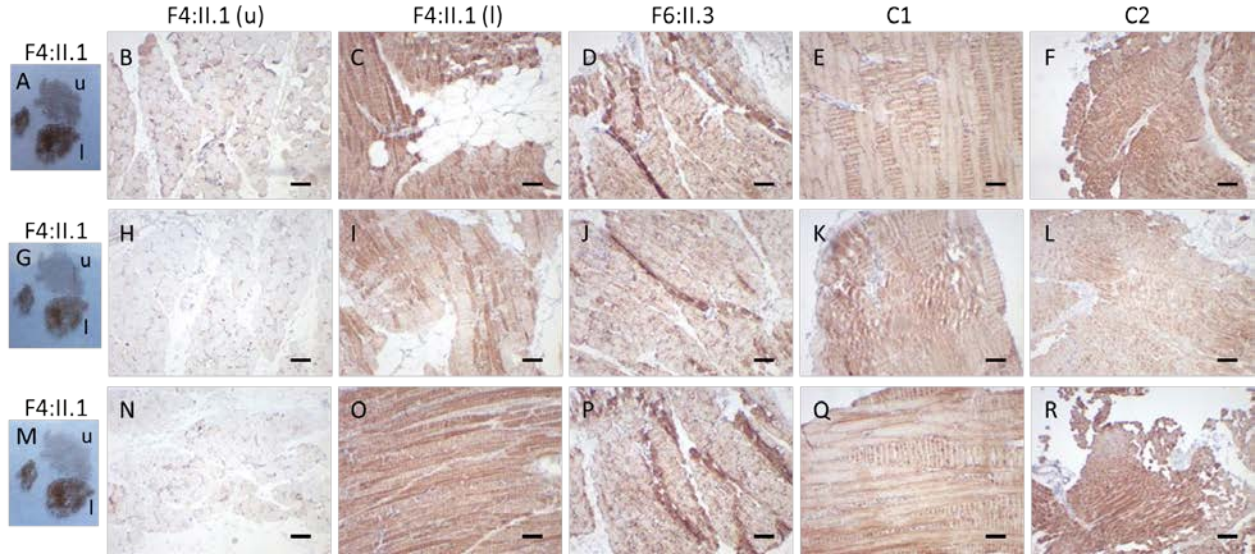

**Figure S7. Immunohistochemical Staining of VDAC1, SDHA and MT-CO1 in Muscle Tissue of Two HPDL-Deficient Individuals (F4:II.1, F6:II.3) and Controls**

Immunohistochemical staining of SDHA, MTCO1 and VDAC1 of formalin-fixed paraffin-embedded muscle tissues. (A-F): VDAC1 staining. (G-L): SDHA staining. (M-R): MT-CO1 staining. (A, G, M): Overview of the sample showing 3 muscle fibre bundles. (B, H, N): VDAC1, SDHA, MT-CO1 negative muscle fibre bundle of individual F4:II.1 upper (u) part of A, G, M respectively. (C, I, O): VDAC1, SDHA, MT-CO1 positive muscle fibre bundle of individual F4:II.1 lower (l) part of A, G, M respectively. Slides were stained with antibodies against complex II subunit SDHA (mouse monoclonal, 1:2000; Abcam), complex IV subunit MT-CO1 (mouse monoclonal, 1:1000; Abcam), and VDAC1 (mouse monoclonal, 1:2000; Abcam). All antibodies were diluted in antibody diluent with background-reducing components (Dako). IHC was performed as described previously.<sup>7</sup> Scale bar = 100  $\mu$ m.

Figure S8

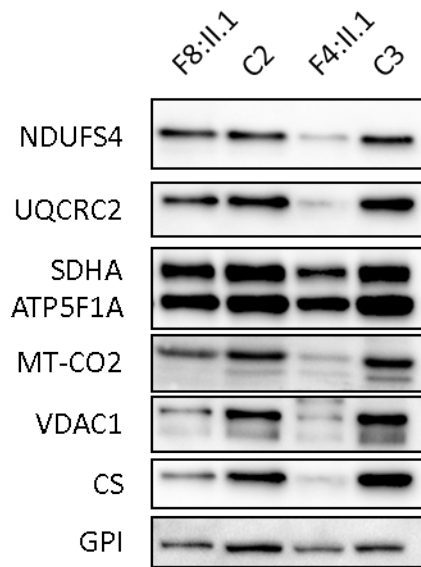

**Figure S8. Relative Levels of OXPHOS Complex Subunits in Muscle Tissue Homogenate Are Reduced in One of Two Affected Individuals**

A total of 10 µg protein of muscle tissue homogenate from affected individuals (F8:II.1, F4:II.1) and controls (n=2) (centrifuged at 600 g) was separated on 10 % acrylamide/bisacrylamide gels and transferred to nitrocellulose membranes. The membranes were washed in Tris-buffered saline (TBS) for 5 min, air-dried for 30 min, washed 10 min in TBS, and blocked 1 h at room temperature in 2 % blocking powder (Roche, Mannheim, Germany) dissolved in TBS. After washing with TBS-Tween 20 (0.5 %; TBS-T), the membranes were incubated with the primary antibody diluted in 2 % blocking powder dissolved in TBS-T. The following primary antibody dilutions and incubation times were used: monoclonal mouse NDUFS4 (1:1,000, 1 h, room temperature; Abcam), SDHA (1:2000, 1 h, room temperature; Abcam), UQCRC2 (1:1500, 1 h, room temperature; Abcam); MT-CO2 (1:1000, 1 h, room temperature; Abcam), ATP5F1A (1:2000, 1 h, room temperature; Abcam), VDAC1 (1:2000, 1 h, room temperature; Abcam), CS (1:3000, 1 h, room temperature; THP), GPI (1:800, 1 h, room temperature; Santa Cruz). After washing, the membranes were incubated with secondary antibodies labeled polymer horseradish peroxidase-(HRP)-antimouse 1:1,00 (EnVision kit, Dako) at room temperature. Detection was carried out with Lumi-LightPLUSPOD substrate (Roche).

## SUPPLEMENTAL TABLES

Table S1

|                             | Enzyme activities [nmol/min/mg protein] |           |            |             |            |           |
|-----------------------------|-----------------------------------------|-----------|------------|-------------|------------|-----------|
| Individual                  | Citrate synthase                        | Complex I | Complex II | Complex III | Complex IV | Complex V |
| F4:II.1                     | 86                                      | 2         | 15         | 74          | 37         | 27        |
| F6:II.3                     | 197                                     | 17        | 267        | 148         | 67         | 114       |
| <i>Control, lower limit</i> | 134                                     | 18        | 28         | 149         | 148        | 60        |
| <i>Control, upper limit</i> | 260                                     | 59        | 69         | 480         | 392        | 223       |
| Specimen: frozen muscle     |                                         |           |            |             |            |           |
| F7:II.2                     | 214                                     | 48        | 58         | 803         | 472        | 167       |
| F8:II.1                     | 196                                     | 34        | 55         | 654         | 396        | 184       |
| <i>Control, lower limit</i> | 150                                     | 28        | 33         | 304         | 202        | 86        |
| <i>Control, upper limit</i> | 338                                     | 76        | 102        | 896         | 889        | 257       |
| Specimen: native muscle     |                                         |           |            |             |            |           |

**Table S1. OXPHOS Enzymes in HPDL Muscle Mitochondria Were Variably Reduced in Two Affected Individuals.**

Primary biochemical data of individual F3:II.3 was not available for review but enzymatic activities were rated as normal according to the provided clinical information. In the remaining individuals, enzyme activities of the OXPHOS complexes were determined as previously described.<sup>1</sup> Briefly, rotenone-sensitive complex I activity was measured spectrophotometrically as NADH/decylubiquinone oxidoreductase at 340 nm. The enzyme activities of citrate synthase and complex IV (ferrocytochrome c/oxygen oxidoreductase), and the oligomycin-sensitive ATPase activity of the F<sub>1</sub>F<sub>0</sub> ATP synthase (complex V) were determined by using buffer conditions as previously described.<sup>2</sup> The whole reaction mixture for the ATPase activity measurement was treated for 10 s with an ultra-sonifier (Bio cell disruptor 250, Branson, Vienna, Austria). The reaction mixture for the measurement of the complex III activity contained 50 mM potassium phosphate buffer pH 7.8, 2 mM EDTA, 0.3 mM KCN, 100 μM cytochrome c, 200 μM reduced decyl-ubiquinol. The reaction was started by addition of the 600 g homogenate. After 3-4 min the reaction was inhibited by addition of 1 μM antimycin A. Antimycin A-insensitive activity was subtracted from total activity to calculate complex III activity. All spectrophotometric measurements (Uvicon 922, Kontron, Milan, Italy) were performed at 37 °C.

Table S2

| Individual                  | Enzyme activities [nmol/min/mg protein] |           |            |             |            |           |
|-----------------------------|-----------------------------------------|-----------|------------|-------------|------------|-----------|
|                             | Citrate synthase                        | Complex I | Complex II | Complex III | Complex IV | Complex V |
| F1:II.1                     | 296                                     | 46        | 113        | 1163        | 527        | 468       |
| F4:II.1                     | 245                                     | 26        | 96         | 946         | 469        | 319       |
| F6:II.3                     | 212                                     | 33        | 92         | 582         | 544        | 368       |
| F8:II.1                     | 145                                     | 28        | 76         | 538         | 300        | 264       |
| <i>Control, lower limit</i> | 225                                     | 18        | 54         | 208         | 270        | 78        |
| <i>Control, upper limit</i> | 459                                     | 53        | 124        | 648         | 659        | 287       |

**Table S2. OXPHOS Enzymes in HPDL Fibroblast Mitochondria Were Normal in Four Affected Individuals (Methods see Table S1)**

Table S3

| Variant                        | Location                | CDS position | Codons  | Protein position | Amino acids | gnomAD AF | SIFT                  | PolyPhen                     | CADD PHRED | CADD RAW | PhyloP   |
|--------------------------------|-------------------------|--------------|---------|------------------|-------------|-----------|-----------------------|------------------------------|------------|----------|----------|
| ENST00000334815.3:<br>c.149G>A | 1:45792969-<br>45792969 | 149          | gGc/gAc | 50               | G/D         | 1.018e-05 | deleterious<br>(0)    | probably_damaging<br>(0.931) | 26.8       | 4.244330 | 5.78105  |
| ENST00000334815.3:<br>c.469T>C | 1:45793289-<br>45793289 | 469          | Tgg/Cgg | 157              | W/R         | 4.61e-05  | tolerated<br>(0.49)   | benign (0.006)               | 18.01      | 1.891146 | 1.06456  |
| ENST00000334815.3:<br>c.503G>A | 1:45793323-<br>45793323 | 503          | tGc/tAc | 168              | C/Y         | 8.246e-06 | deleterious<br>(0)    | probably_damaging<br>(0.984) | 26.9       | 4.268768 | 6.40164  |
| ENST00000334815.3:<br>c.537G>C | 1:45793357-<br>45793357 | 537          | tgG/tgC | 179              | W/C         | -         | deleterious<br>(0.01) | probably_damaging<br>(0.99)  | 27.4       | 4.350300 | 5.40869  |
| ENST00000334815.3:<br>c.650T>C | 1:45793470-<br>45793470 | 650          | cTg/cCg | 217              | L/P         | -         | deleterious<br>(0)    | probably_damaging<br>(0.983) | 26.0       | 4.080206 | 4.91222  |
| ENST00000334815.3:<br>c.701T>C | 1:45793521-<br>45793521 | 701          | cTt/cCt | 234              | L/P         | 5.019e-06 | deleterious<br>(0)    | probably_damaging<br>(0.99)  | 25.2       | 3.849507 | 5.28457  |
| ENST00000334815.3:<br>c.743T>C | 1:45793563-<br>45793563 | 743          | cTg/cCg | 248              | L/P         | -         | deleterious<br>(0)    | probably_damaging<br>(0.998) | 27.9       | 4.421106 | 7.14635  |
| ENST00000334815.3:<br>c.753C>A | 1:45793573-<br>45793573 | 753          | caC/caA | 251              | H/Q         | -         | deleterious<br>(0)    | possibly_damaging<br>(0.831) | 22.1       | 2.550874 | 0.568087 |
| ENST00000334815.3:<br>c.779G>A | 1:45793599-<br>45793599 | 779          | gGg/gAg | 260              | G/E         | 4.509e-06 | deleterious<br>(0.01) | probably_damaging<br>(0.978) | 23.4       | 3.084593 | 3.67104  |
| ENST00000334815.3:<br>c.797T>C | 1:45793617-<br>45793617 | 797          | aTt/aCt | 266              | I/T         | 8.506e-06 | deleterious<br>(0)    | probably_damaging<br>(0.998) | 25.2       | 3.836215 | 7.14635  |
| ENST00000334815.3:<br>c.859T>C | 1:45793679-<br>45793679 | 859          | Tac/Cac | 287              | Y/H         | 9.954e-05 | deleterious<br>(0)    | probably_damaging<br>(1)     | 26.6       | 4.214790 | 7.14635  |

**Table S3. Detailed Information on All Missense Variants Observed in This Study.**

The table comprises chromosomal location according to GRCh37/hg19 (Location), coding sequence (CDS position), protein position (Protein position), nucleotide (Codons), predicted amino acid exchange (Amino acids) and gnomAD allele frequency (gnomAD AF). Scores were obtained using the online interface of Ensembl Variant Effect Predictor and 100 vertebrates Basewise Conservation by PhyloP (phyloP100wayAll) in UCSC.<sup>3, 4</sup> Raw values are given in brackets for SIFT and PolyPhen-2, CADD scores are displayed as PHRED-like scores (CADD PHRED) and raw values (CADD RAW). References as provided by Ensembl VEP: SIFT: <0.05 deleterious, ≥0.05 tolerated, PolyPhen: >0.908 probably damaging, >0.446 and ≤0.908 possibly damaging, ≤0.446 benign, CADD PHRED >30 likely deleterious (predicted to be among the 0.1 % most deleterious possible substitutions in human genome). PhyloP: positive scores: conserved nucleotide, negative scores: fast-evolving site.



## SUPPLEMENTAL MATERIAL AND METHODS

**Cell Culture.** Fibroblasts from affected individuals, SV40 large T antigen-immortalized fibroblasts from affected individuals or N2a cells were maintained in DMEM with D-glucose and pyruvate (Gibco), 10 % FBS (Gibco) and 1 % Penicillin/Streptomycin (Gibco). All cells were incubated at 37 °C and kept under 5 % CO<sub>2</sub> atmosphere. Cells were routinely tested for mycoplasma contamination.

**HPDL cDNA Overexpression in N2A Cells (Figure 2).** *HPDL* cDNA was amplified with Phusion polymerase (Thermo) using primer with overhanging ends containing restriction sites for cloning and the double FLAG-tag in frame. Wild-type *HPDL* was amplified with *HPDL\_for* GGGagatctGCCgcatggccgcgcccg and *HPDL\_full\_rev* gggGCGGCCGcttaCTTGTCGTCATCGTCTTTGTAGTCCTTGTCGTCATCGTCTTTGTAGTCggcttcctggctcctggcagattgc. PCR products were gel purified and cut with restriction enzymes and placed in the pEGFP-N1 vector. Resulting clones were Sanger sequenced and transfected into near-confluency N2a cells with Lipofectamine P3000 (Thermo). 24 hours following transfection cells were incubated with 100 nM Mitotracker Red CMXRos (Invitrogen) in medium for 45 minutes at 37 °C and fixed with Methanol at -20 °C for 15 minutes. Fixed cells were stained with a rabbit α-FLAG antibody (Sigma Aldrich) and subsequently with a goat α-rabbit-Alexa Fluor 488 antibody (Invitrogen). DAPI staining (Invitrogen) was performed according to the instructions of the manufacturer. Fixed cells were mounted with Fluoromount G (Southern Biotech) and were analysed with a Zeiss LSM 880 confocal microscope.

## SUPPLEMENTAL REFERENCES

1. Feichtinger, R.G., Zimmermann, F., Mayr, J.A., Neureiter, D., Hauser-Kronberger, C., Schilling, F.H., Jones, N., Sperl, W., and Kofler, B. (2010). Low aerobic mitochondrial energy metabolism in poorly- or undifferentiated neuroblastoma. *BMC Cancer* 10, 149.
2. Rustin, P., Chretien, D., Bourgeron, T., Gerard, B., Rotig, A., Saudubray, J.M., and Munnich, A. (1994). Biochemical and molecular investigations in respiratory chain deficiencies. *Clin Chim Acta* 228, 35-51.
3. McLaren, W., Gil, L., Hunt, S.E., Riat, H.S., Ritchie, G.R., Thormann, A., Flicek, P., and Cunningham, F. (2016). The Ensembl Variant Effect Predictor. *Genome Biol* 17, 122.
4. Kent, W.J., Sugnet, C.W., Furey, T.S., Roskin, K.M., Pringle, T.H., Zahler, A.M., and Haussler, D. (2002). The human genome browser at UCSC. *Genome Res* 12, 996-1006.
5. Schindelin, J., Arganda-Carreras, I., Frise, E., Kaynig, V., Longair, M., Pietzsch, T., Preibisch, S., Rueden, C., Saalfeld, S., Schmid, B., et al. (2012). Fiji: an open-source platform for biological-image analysis. *Nat Methods* 9, 676-682.
6. Valente, A.J., Maddalena, L.A., Robb, E.L., Moradi, F., and Stuart, J.A. (2017). A simple ImageJ macro tool for analyzing mitochondrial network morphology in mammalian cell culture. *Acta Histochem* 119, 315-326.
7. Zimmermann, F.A., Mayr, J.A., Neureiter, D., Feichtinger, R., Alinger, B., Jones, N.D., Eder, W., Sperl, W., and Kofler, B. (2009). Lack of complex I is associated with oncocytic thyroid tumours. *Br J Cancer* 100, 1434-1437.
